# Supplementary material
Source: MDPI journal article supplement (https://www.mdpi.com/2079-6412/13/12/2045)
Supplement: s1 [file s1]

# Self-Healing UV-Curable Urethane (Meth)acrylates with Various Soft Segment Chemistry

Paulina Bednarczyk <sup>1,\*</sup>, Paula Ossowicz-Rupniewska <sup>1</sup>, Joanna Kleboko <sup>1</sup>, Joanna Rokicka <sup>1</sup>, Yongping Bai <sup>2,3</sup> and Zbigniew Czech <sup>1</sup>

<sup>1</sup> Department of Chemical Organic Technology and Polymeric Materials, Faculty of Chemical Technology and Engineering, West Pomeranian University of Technology in Szczecin, Piastów Ave. 42, 71-065 Szczecin, Poland; possowicz@zut.edu.pl (P.O.-R.); joanna.kleboko@zut.edu.pl (J.K.); psa\_czech@wp.pl (Z.C.)

<sup>2</sup> School of Chemistry and Chemical Engineering, Harbin Institute of Technology, Harbin 150001, China

<sup>3</sup> Wuxi HIT New Material Research Institute Co., Ltd., Wuxi 214000, China

\* Correspondence: bednarczyk.pb@gmail.com or paulina.bednarczyk@zut.edu.pl

## HODA (Hydroxymethyl)-10-oxatricyclo[5.2.1.0<sup>2,6</sup>]dec-8-ene-3,5-dione-2-aminoethanol)

<sup>1</sup>H NMR (400 MHz, CDCl<sub>3</sub>, 298 K)  $\delta$  (ppm) 6.61 (d, 1H), 6.55 (t, 1H), 5.28 (s, 1H), 4.11 (s, 2H), 3.76 (t, 2H), 3.69 (t, 2H), 3.04 (d, 1H), 3.01 (d, 1H), 2.85 (s, 1H), 2.28 (s, 1H); <sup>13</sup>C NMR (400 MHz, CDCl<sub>3</sub>, 298 K)  $\delta$  (ppm): 138.31; 136.96; 91.50; 80.96; 60.72; 60.16; 49.99; 48.17; 41.75; FT-IR (cm<sup>-1</sup>) 417, 456, 499, 522, 584, 613, 644, 678, 716, 731, 787, 805, 836, 844, 876, 932, 953, 977, 1012, 1036, 1074, 1091, 1111, 1159, 1185, 1248, 1272, 1289, 1303, 1326, 1348, 1363, 1402, 1428, 1681, 1766, 2883, 2917, 2929, 2950, 2978, 3016, 3085, 3428.

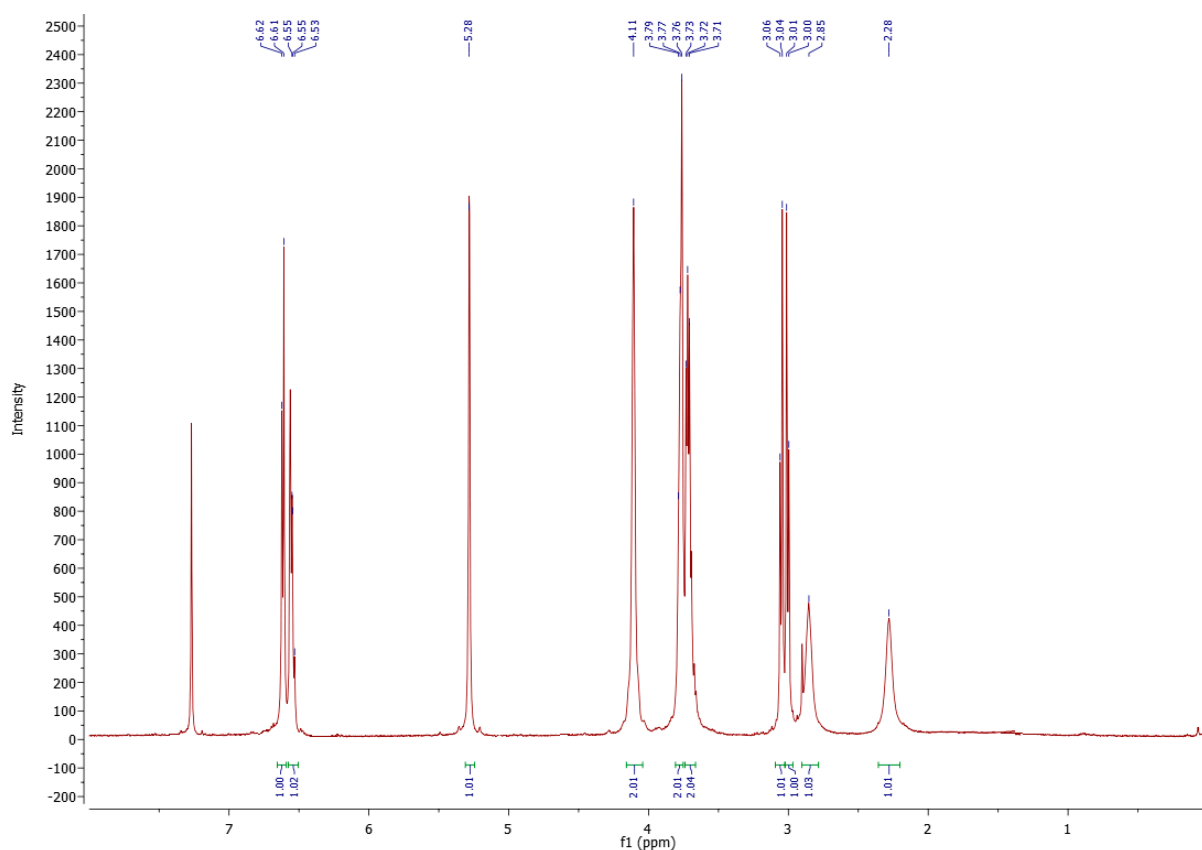

Figure S1. <sup>1</sup>H NMR HODA spectrum.

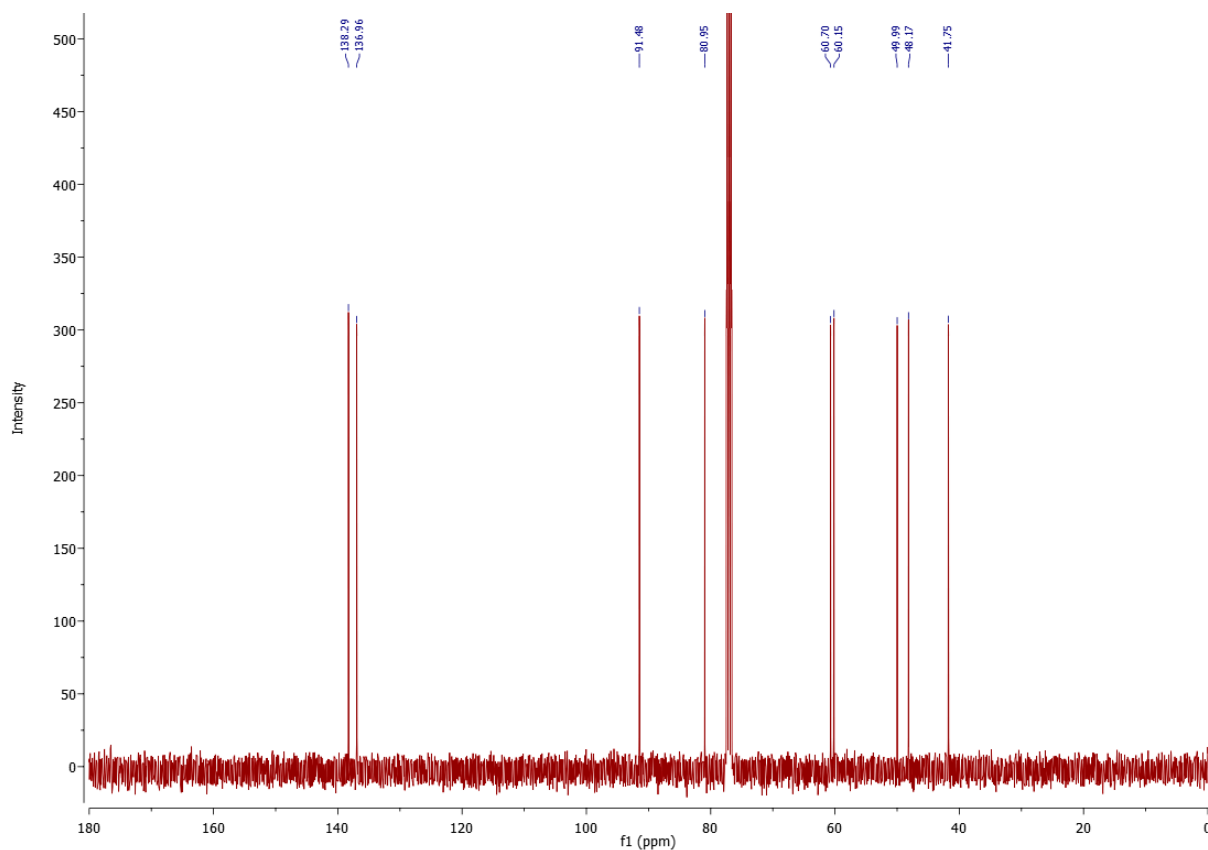

**Figure S2.** <sup>13</sup>C NMR HODA spectrum.

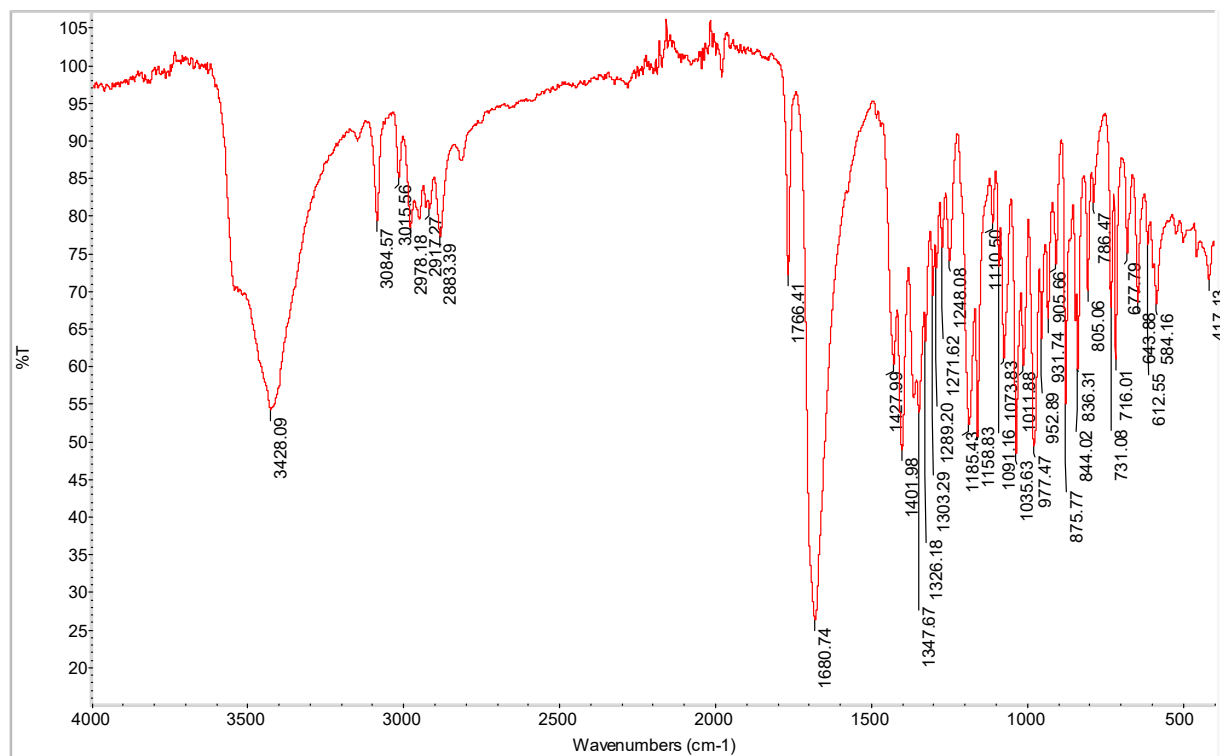

**Figure S3.** ATR-FTIR HODA spectrum.

**The FT-IR spectra during the reaction time for the obtained urethane  
(meth)acrylates**

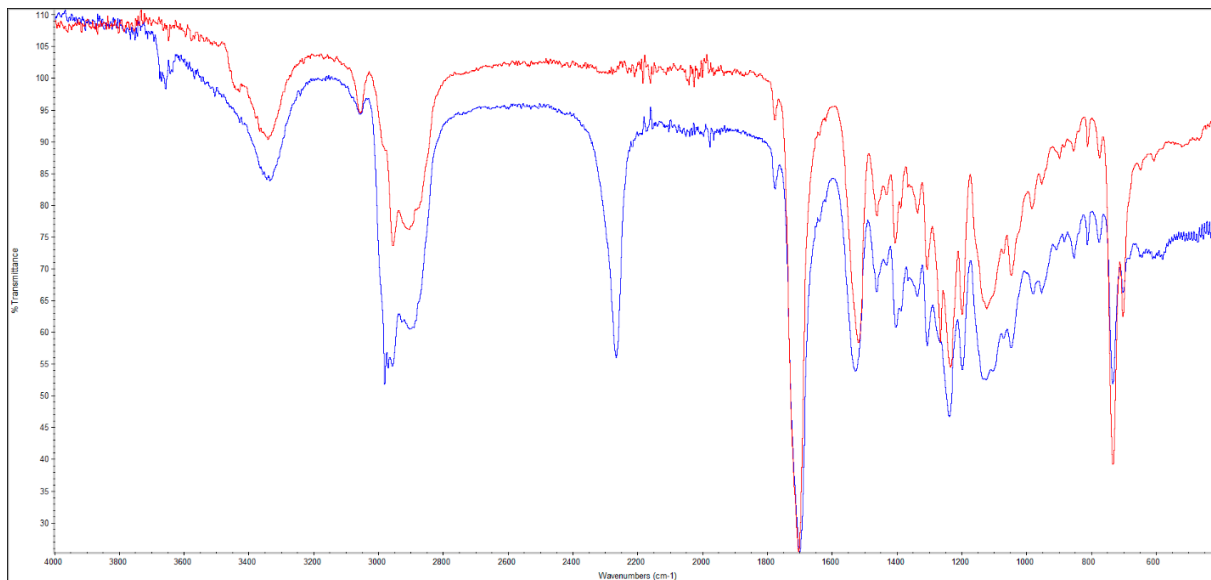

**Figure S4.** Comparative of FTIR spectra investigating the reaction of receiving PEG400-HPA after 0 (blue) and 1 h (red) of reaction time. Comparison of FTIR peaks: NCO stretching at 2270 cm<sup>-1</sup>.

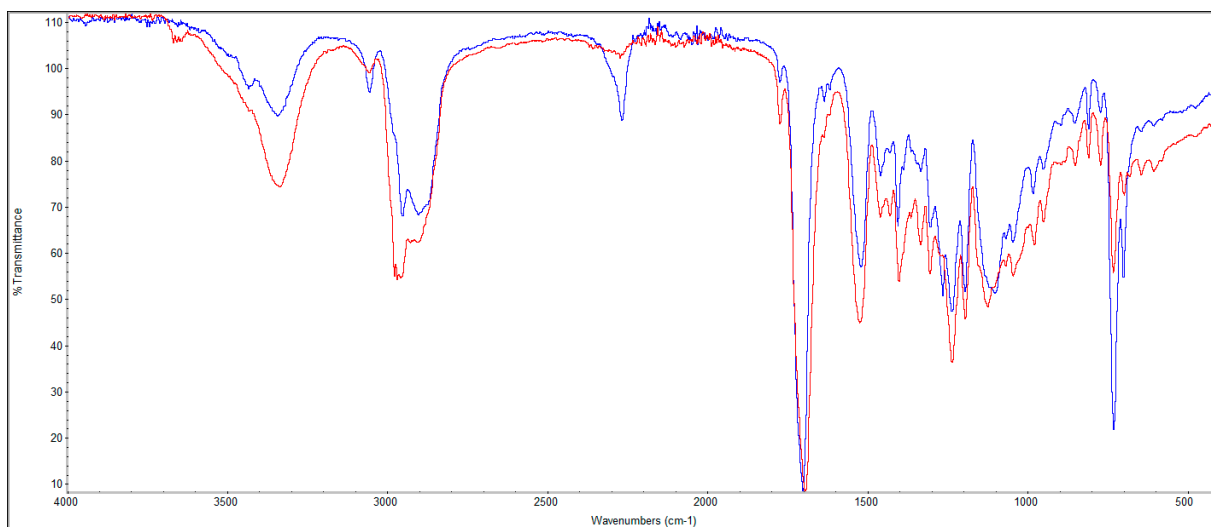

**Figure S5.** Comparative of FTIR spectra investigating the reaction of receiving PEG600-HPA after 0 (blue) and 1 h (red) of reaction time. Comparison of FTIR peaks: NCO stretching at 2270 cm<sup>-1</sup>.

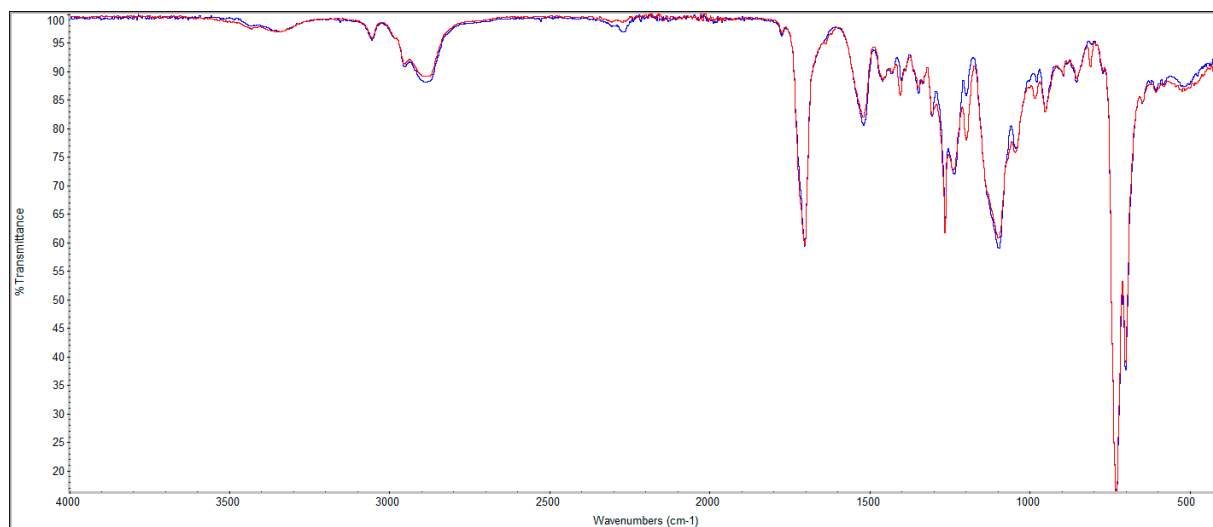

**Figure S6.** Comparative of FTIR spectra investigating the reaction of receiving PEG1000-HPA after 0 (blue) and 1 h (red) of reaction time. Comparison of FTIR peaks: NCO stretching at 2270  $\text{cm}^{-1}$ .

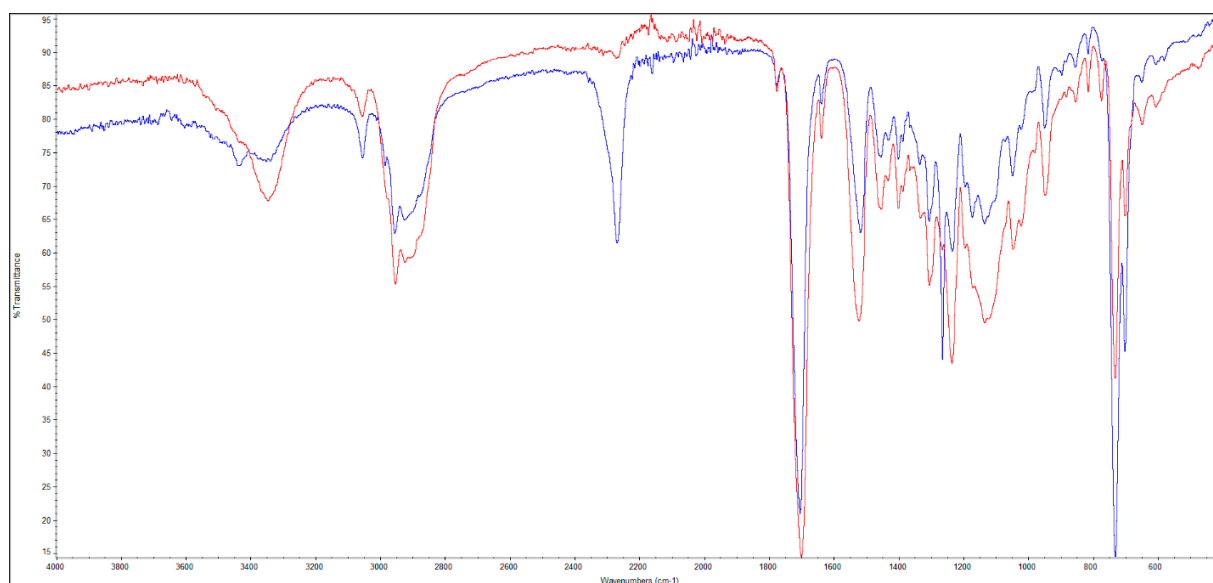

**Figure S7.** Comparison of FTIR spectra investigating the reaction of receiving PEG400-HPMA after 0 (blue) and 3 h (red) reaction time. Comparison of FTIR peaks: NCO stretching at 2270  $\text{cm}^{-1}$ .

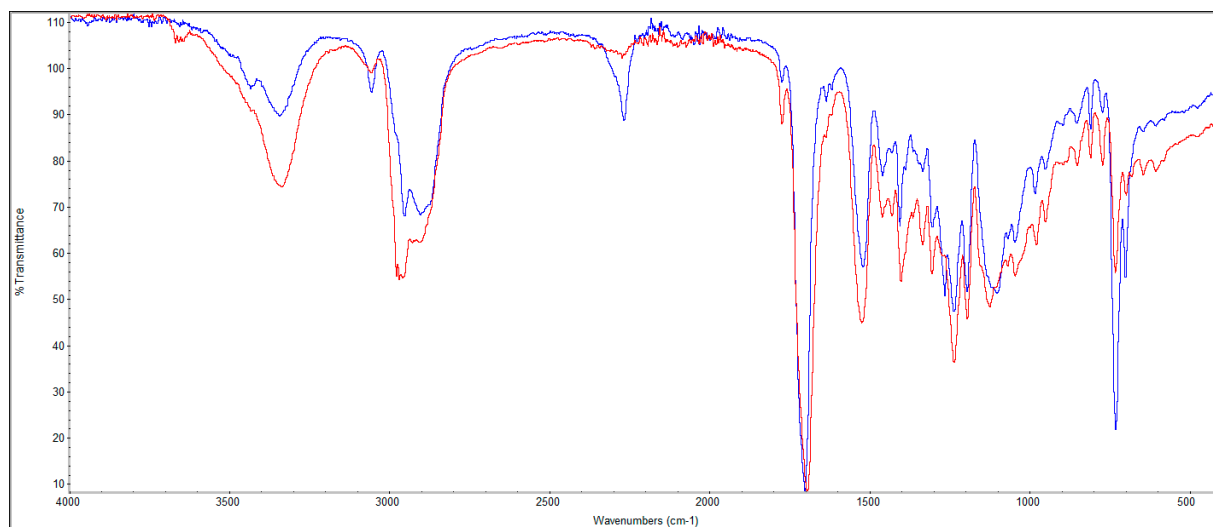

**Figure S8.** Comparative of FTIR spectra investigating the reaction of receiving PEG600-HPMA after 0 (blue) and 4 h (red) of reaction time. Comparison of FTIR peaks: NCO stretching at 2270  $\text{cm}^{-1}$ .

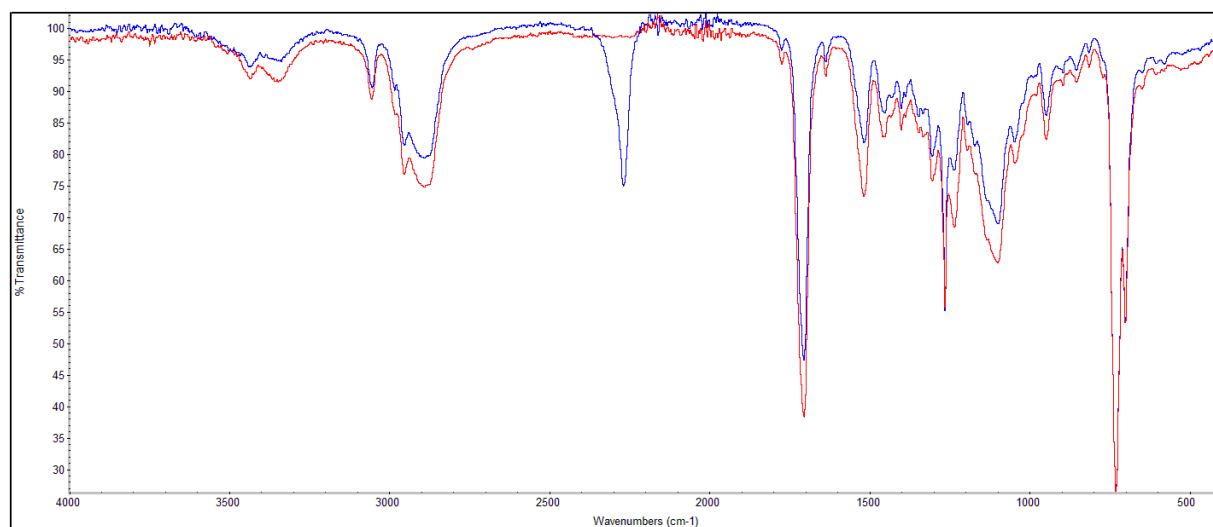

**Figure S9.** Comparative of FTIR spectra investigating the reaction of receiving PEG1000-HPMA after 0 (blue) and 3 h (red) of reaction time. Comparison of FTIR peaks: NCO stretching at 2270  $\text{cm}^{-1}$ .

### Selected NMR spectra of the obtained urethane (meth)acrylates

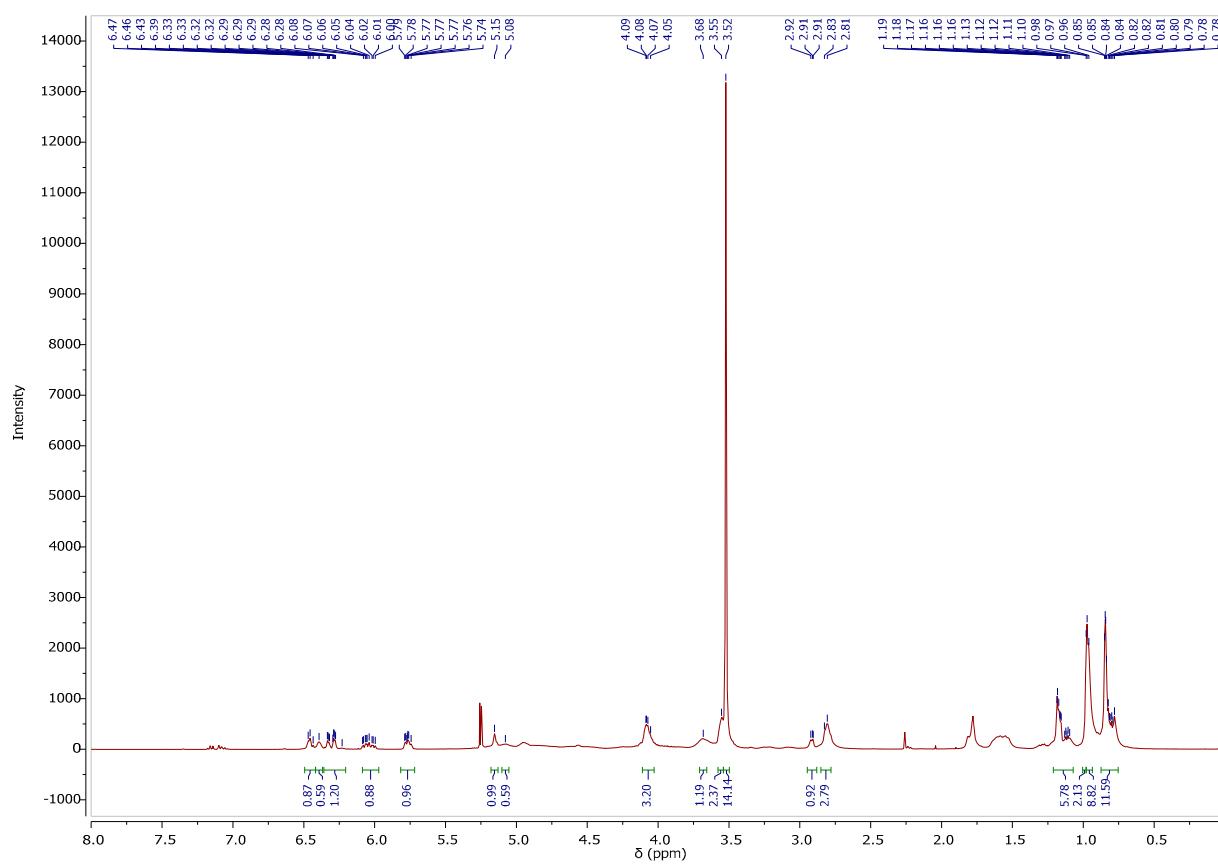

Figure S10.  $^1\text{H}$  NMR spectra of PEG400-HPA.

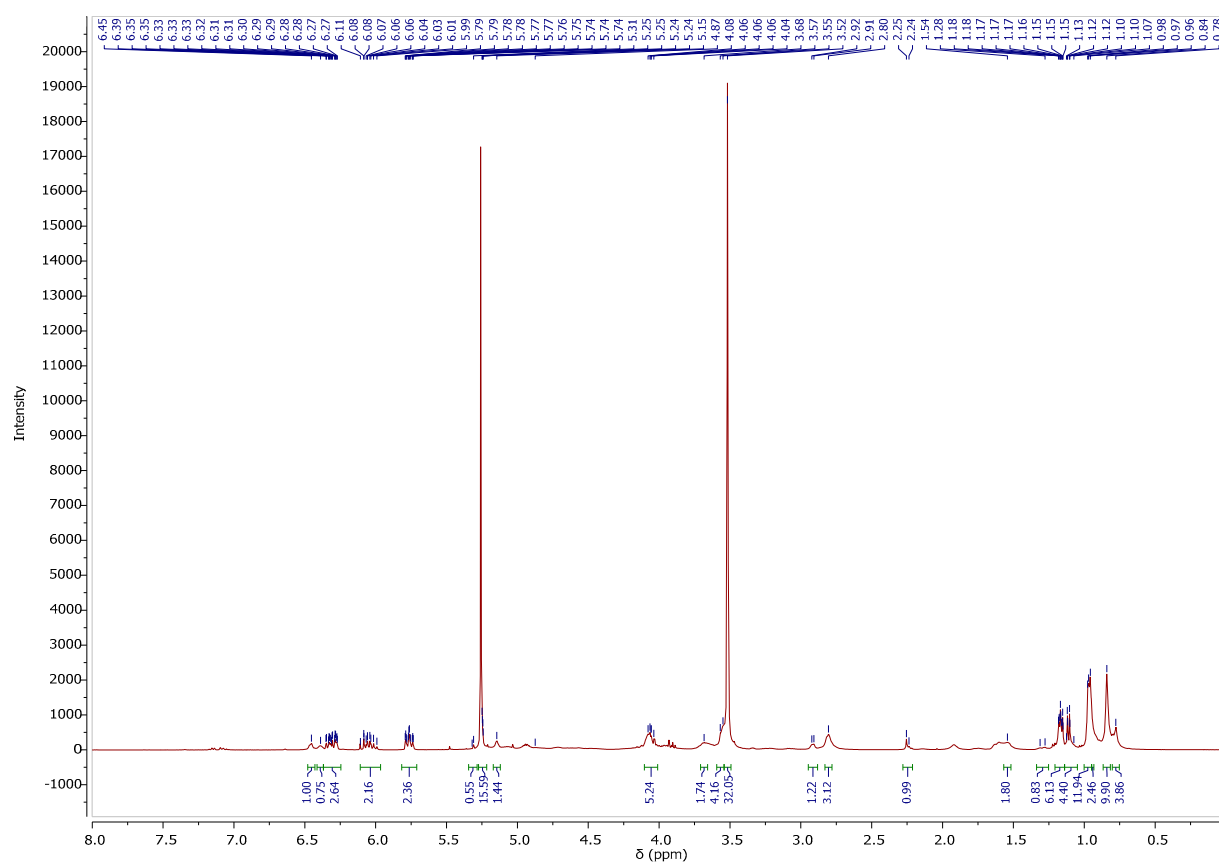

**Figure S11.**  $^1\text{H}$  NMR spectra of PEG600-HPA.

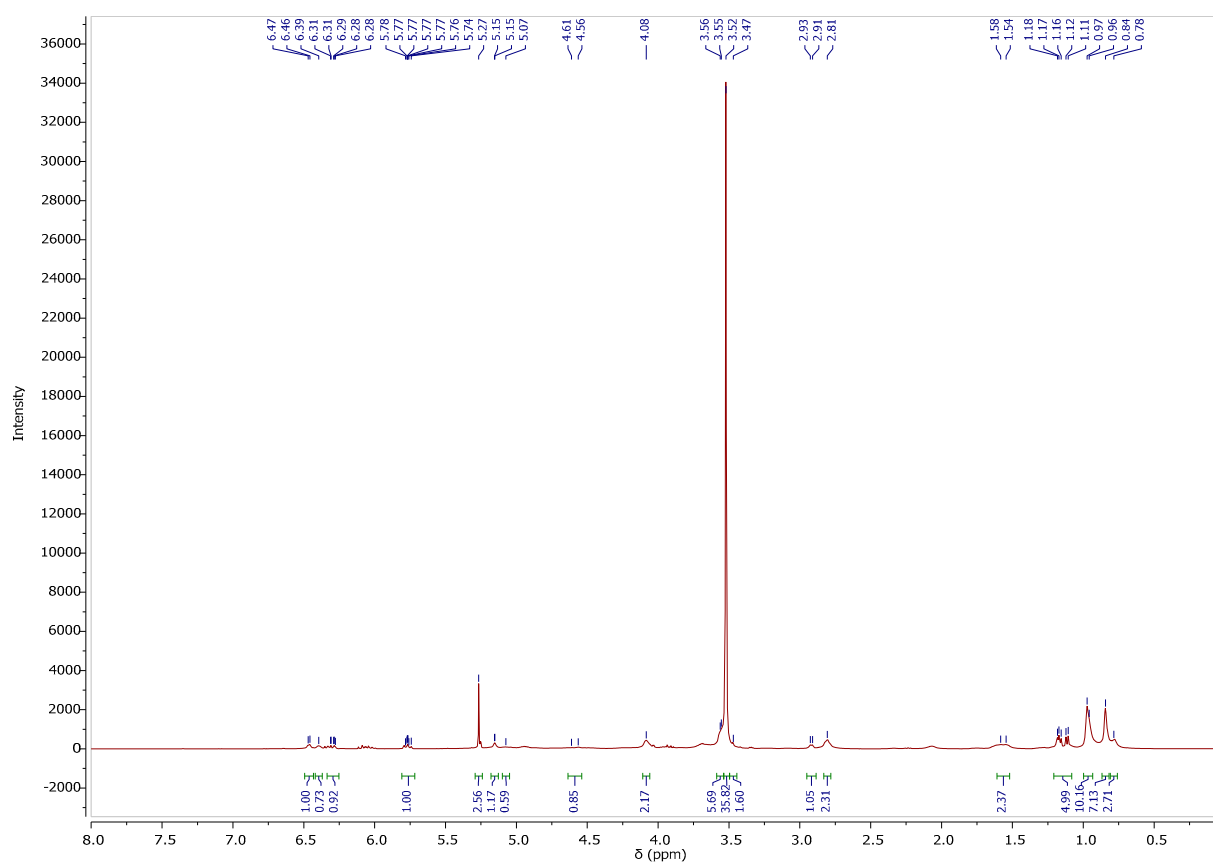

**Figure S12.**  $^1\text{H}$  NMR spectra of PEG1000-HPA.



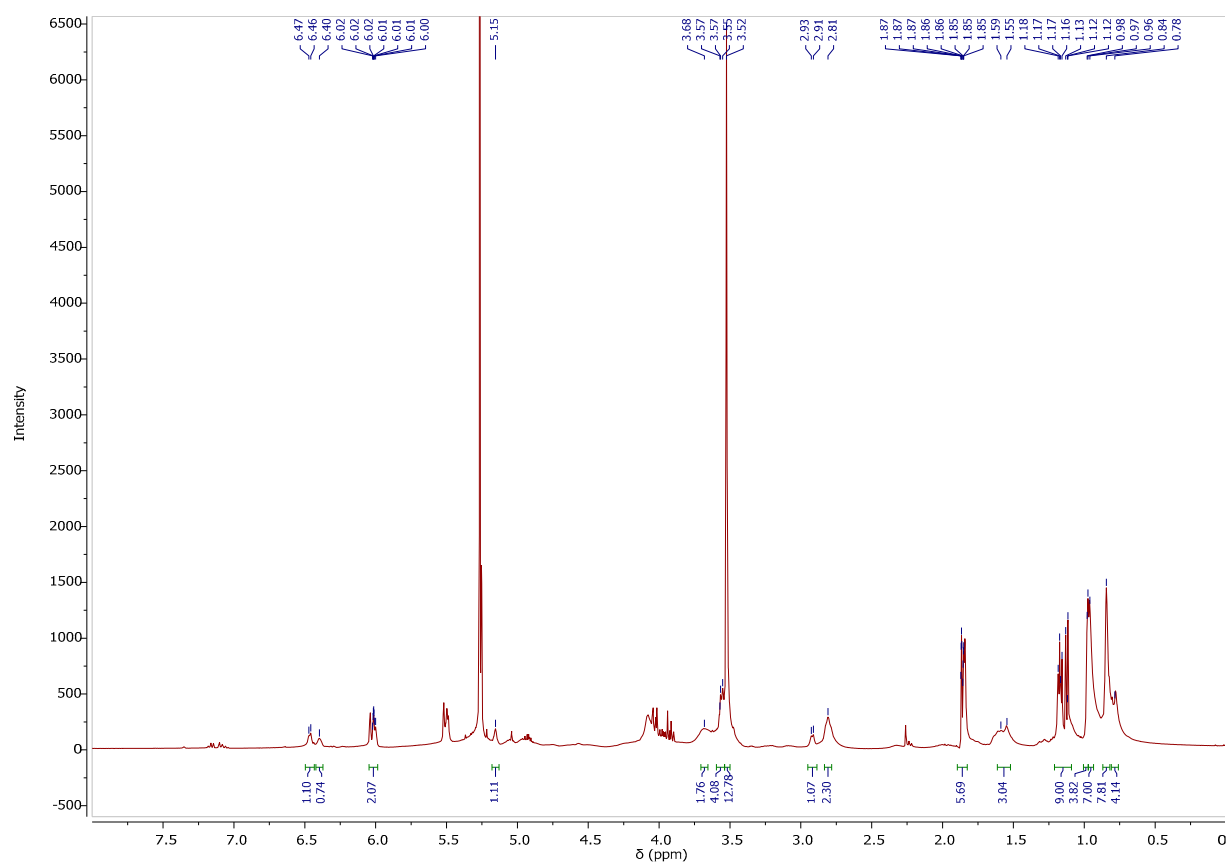

**Figure S13.**  $^1\text{H}$  NMR spectra of PEG400-HPMA.

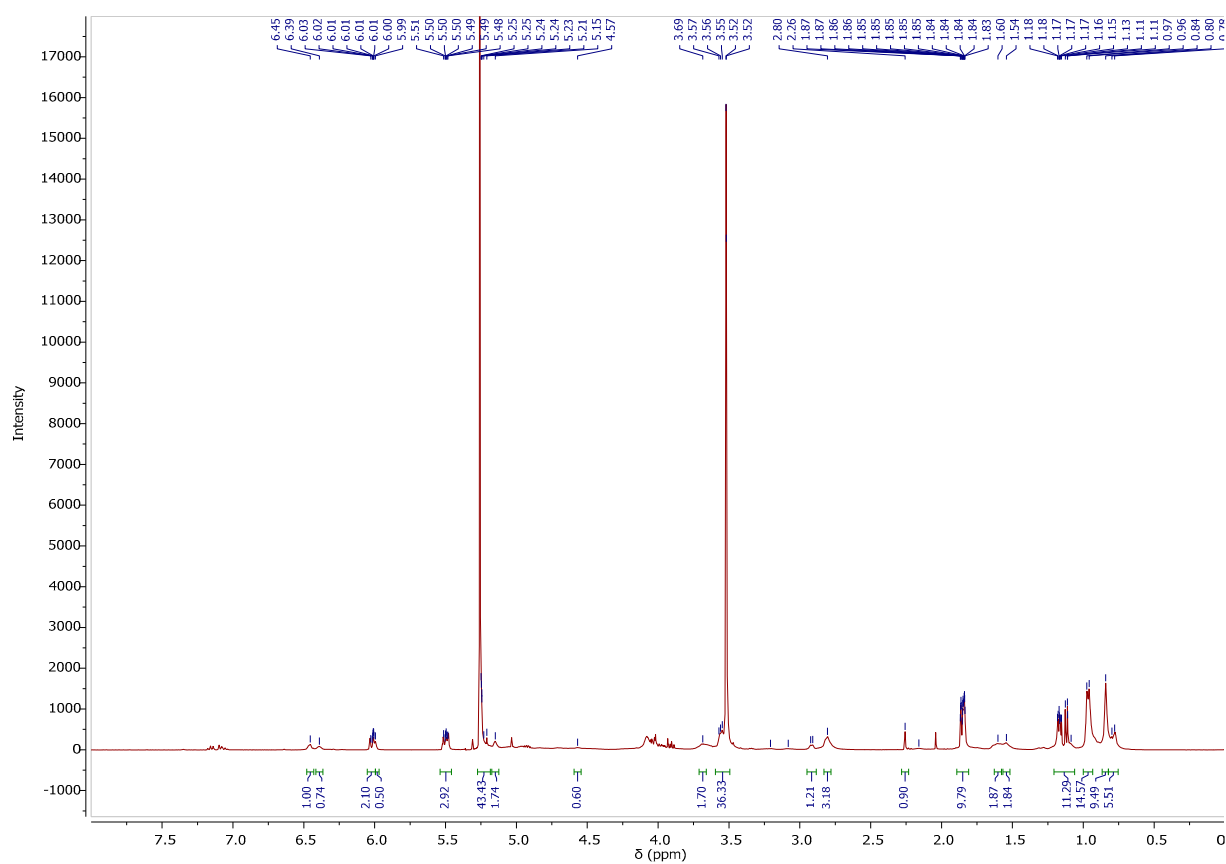

**Figure S14.**  $^1\text{H}$  NMR spectra of PEG600-HPMA.

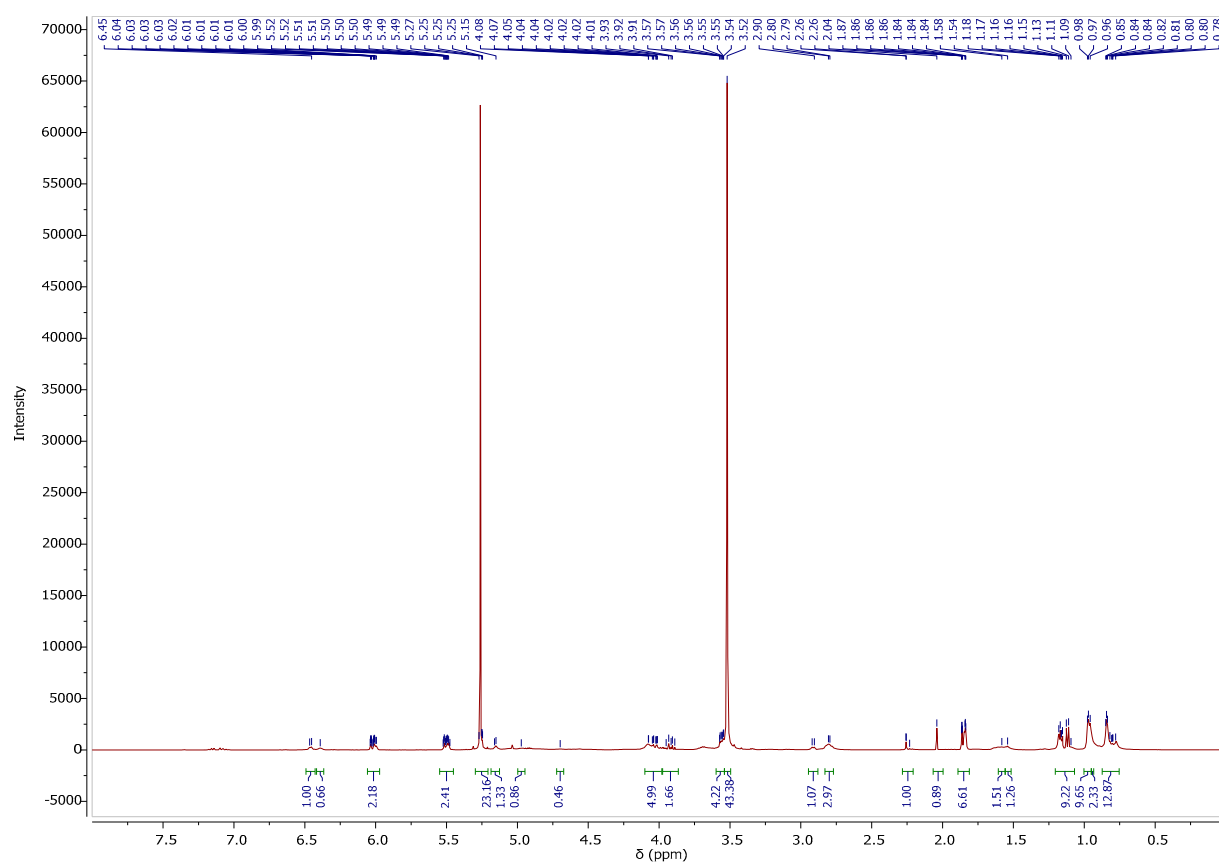

**Figure S15.**  $^1\text{H}$  NMR spectra of PEG1000-HPMA.

## The TG and DTG curves of the obtained urethane (meth)acrylates.

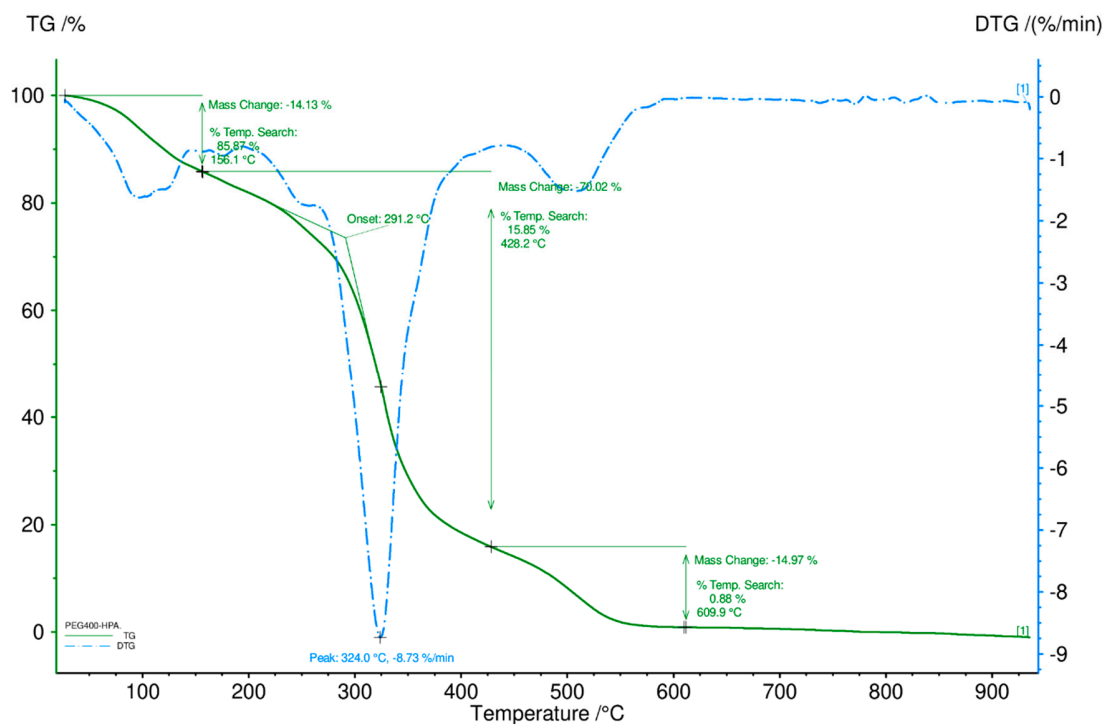

Figure S16. TG and DTG curves of PEG400-HPA.

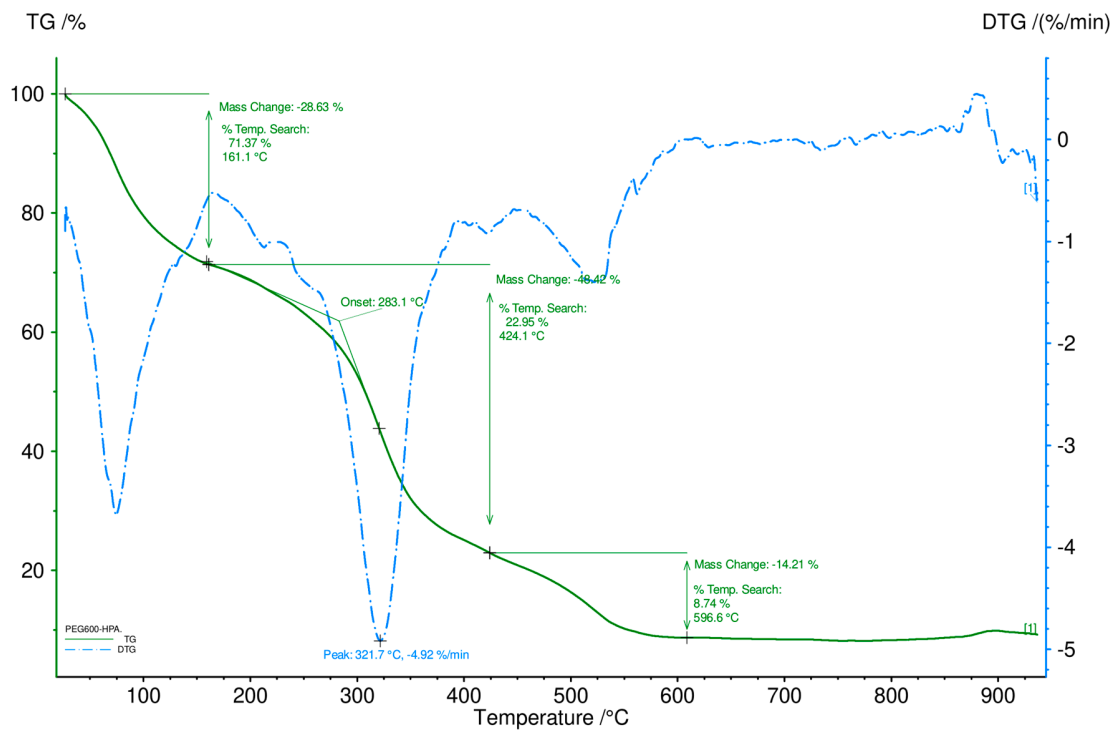

Figure S17. TG and DTG curves of PEG600-HPA.

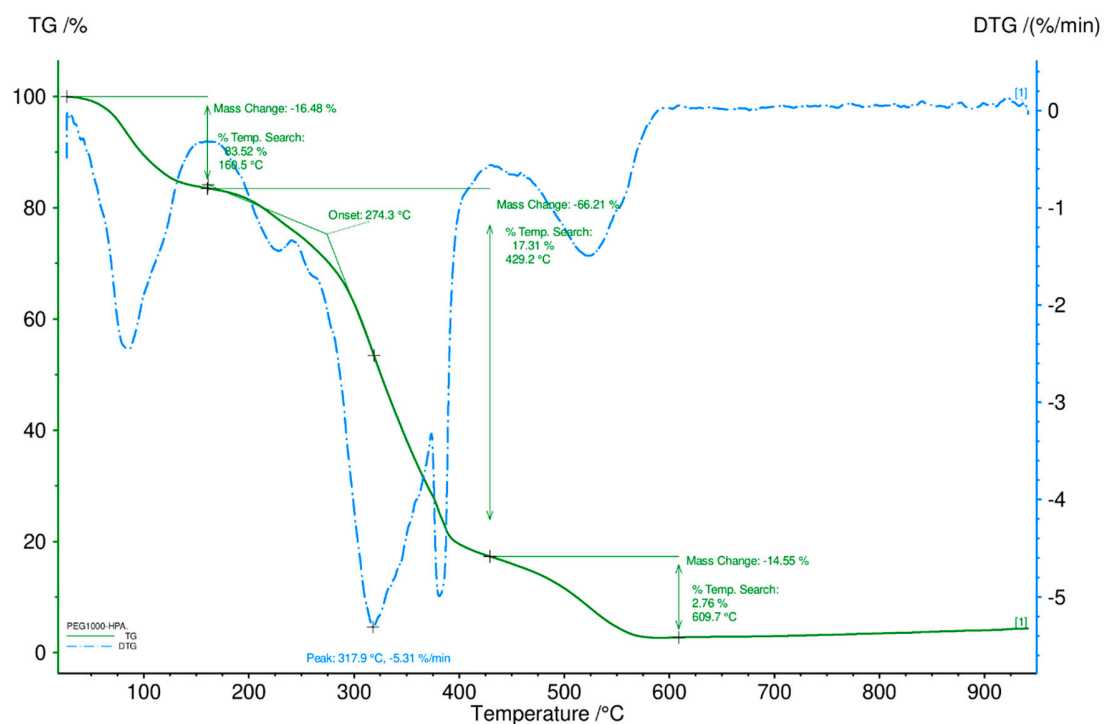

**Figure S17.** TG and DTG curves of PEG1000-HPA.

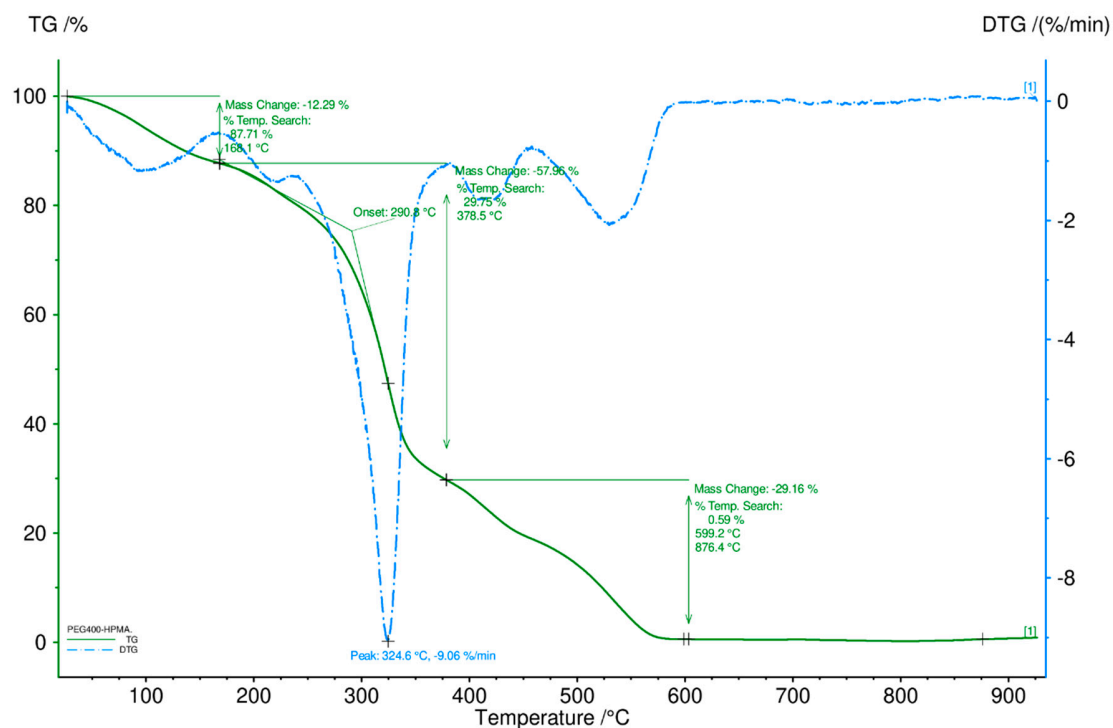

**Figure S19.** TG and DTG curves of PEG400-HPMA.

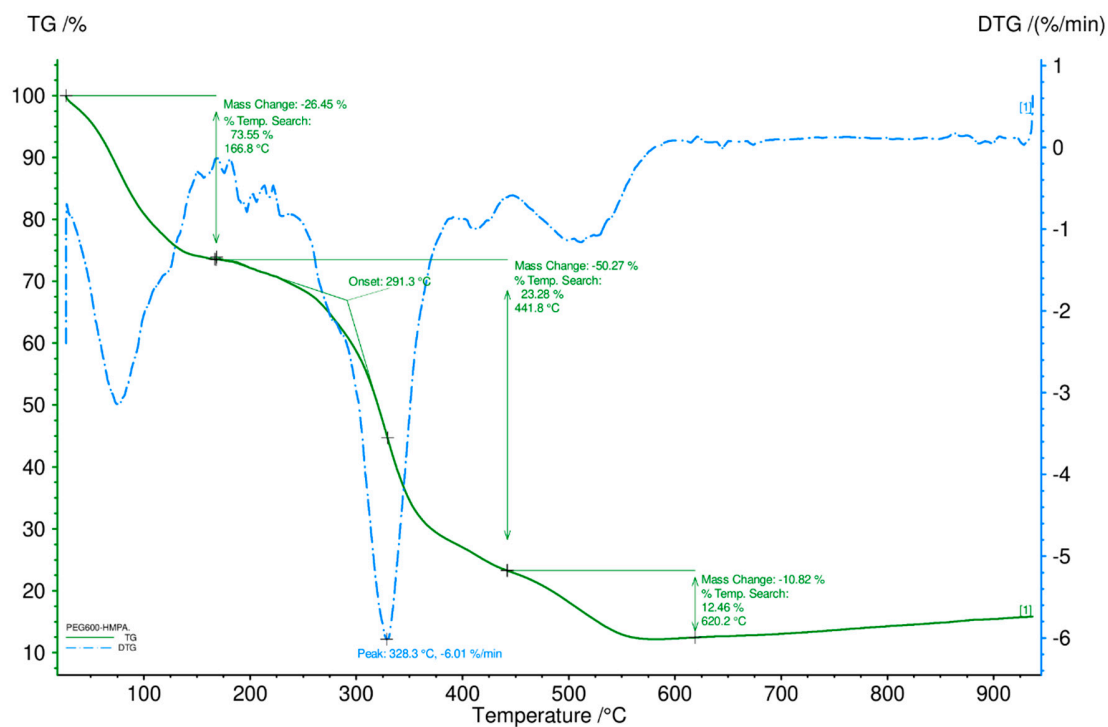

**Figure S18.** TG and DTG curves of PEG600-HPMA.

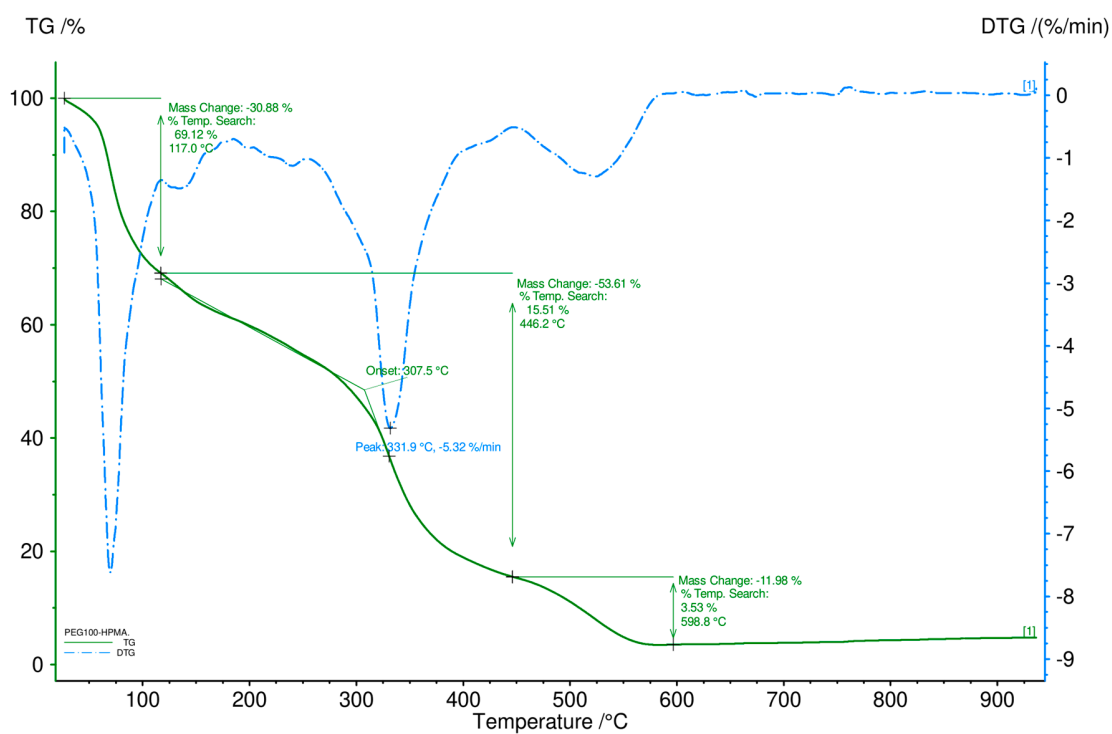

**Figure S19.** TG and DTG curves of PEG1000-HPMA.
